# Supplementary material for: One-pot, three component tandem reaction of 2-aminopyridines, acetophenones and aldehydes: synthesis of 3-aroylimidazo[1,2-a]pyridines
Source: Royal Society of Chemistry journal article supplement (doi:10.1039/c4ra13056a), 2014-12-04

## Supporting Information

### Supporting Information

#### One-pot, Three Component Tandem Reaction of 2-Aminopyridines, Acetophenones and Aldehydes: Synthesis of 3-Aroylimidazo[1,2-*a*]pyridines

Pinku Kaswan, Kasiviswanadharaju Pericherla, Hitesh Kumar Saini, and Anil Kumar\*

*<sup>a</sup>Department of Chemistry, Birla Institute of Technology and Science, Pilani 333 031, Rajasthan, India  
Email: [anilkumar@pilani.bits-pilani.ac.in](mailto:anilkumar@pilani.bits-pilani.ac.in)*

#### Contents

1. Characterization data for **6a** ..... S2
2. Copies of <sup>1</sup>H NMR and <sup>13</sup>C NMR spectra of compounds **4a-p** and **6a** ..... S3

#### 1. Characterization data for **6a**:

**2-Phenylimidazo[1,2-*a*]pyridine (6a)**: Off-white solid; mp 134-136 °C; <sup>1</sup>H NMR (300 MHz, CDCl<sub>3</sub>) δ 8.11 (d, *J* = 6.6 Hz, 1H), 7.96 (d, *J* = 7.6 Hz, 2H), 7.85 (s, 1H), 7.65 (d, *J* = 9.1 Hz, 1H), 7.44 (t, *J* = 7.5 Hz, 2H), 7.35 – 7.30 (m, 1H), 7.17 (t, *J* = 7.9 Hz, 1H), 6.78 (t, *J* = 6.6 Hz, 1H); <sup>13</sup>C NMR (75 MHz, CDCl<sub>3</sub>) δ 145.74, 137.95, 133.65, 128.69, 127.99, 126.11, 125.59, 124.76, 117.55, 112.51, 108.19.

2. Copies of  $^1\text{H}$  NMR and  $^{13}\text{C}$  NMR spectra of compounds **4a-p** and **6a**

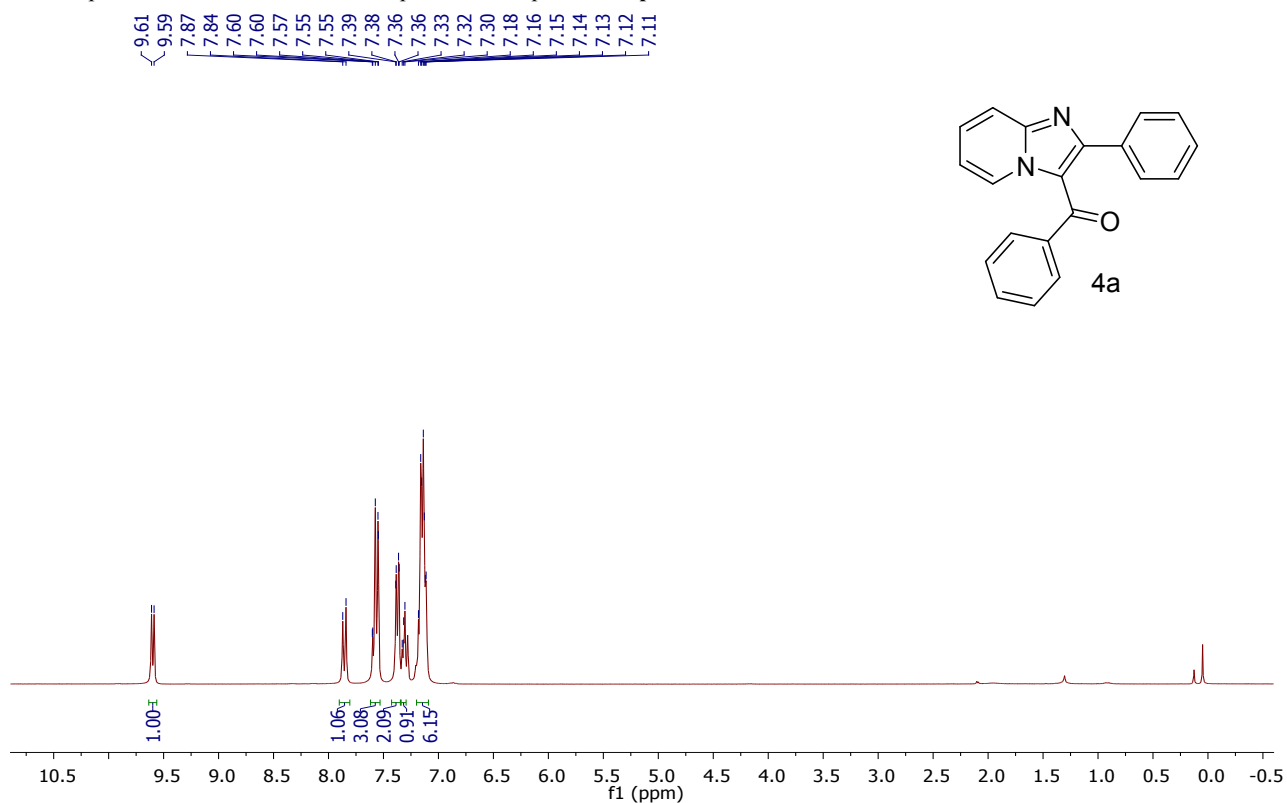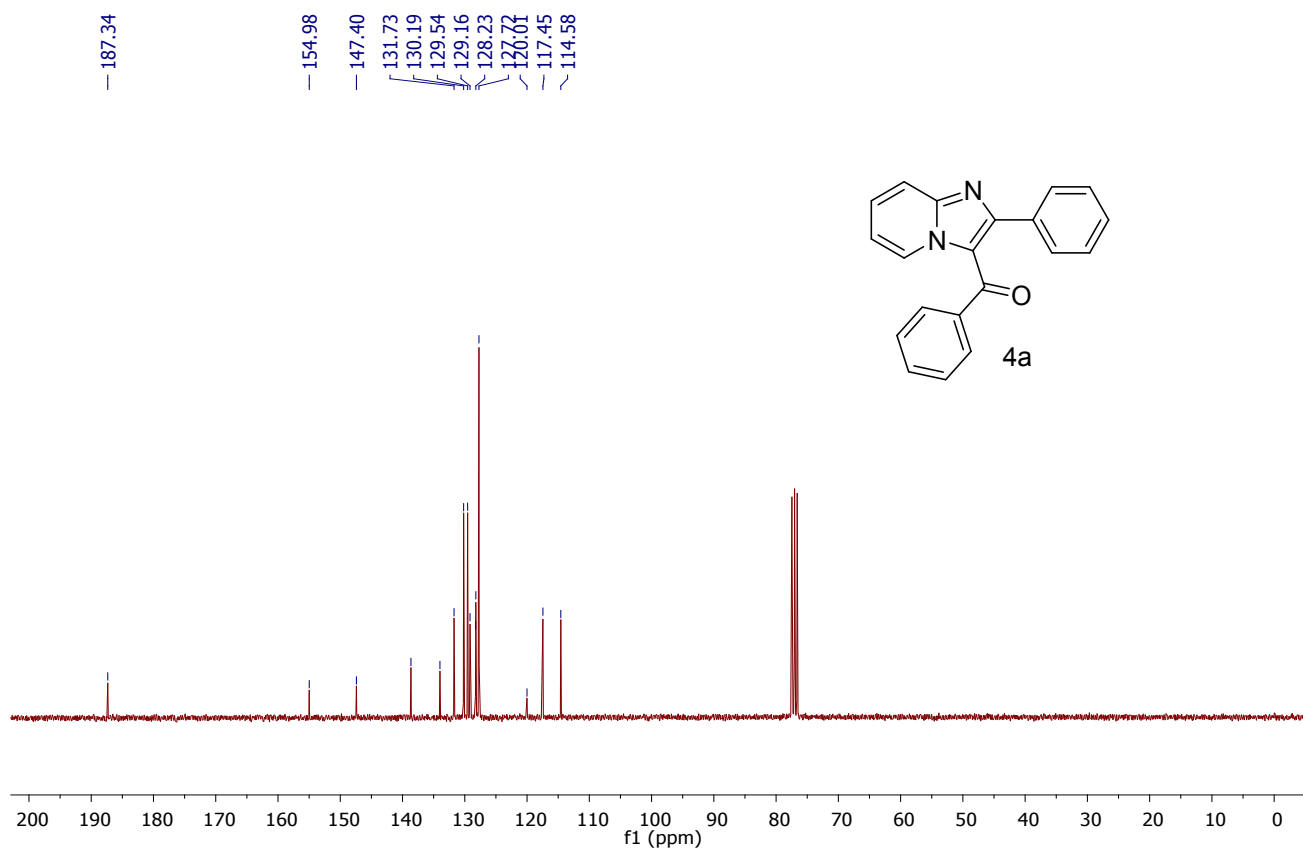

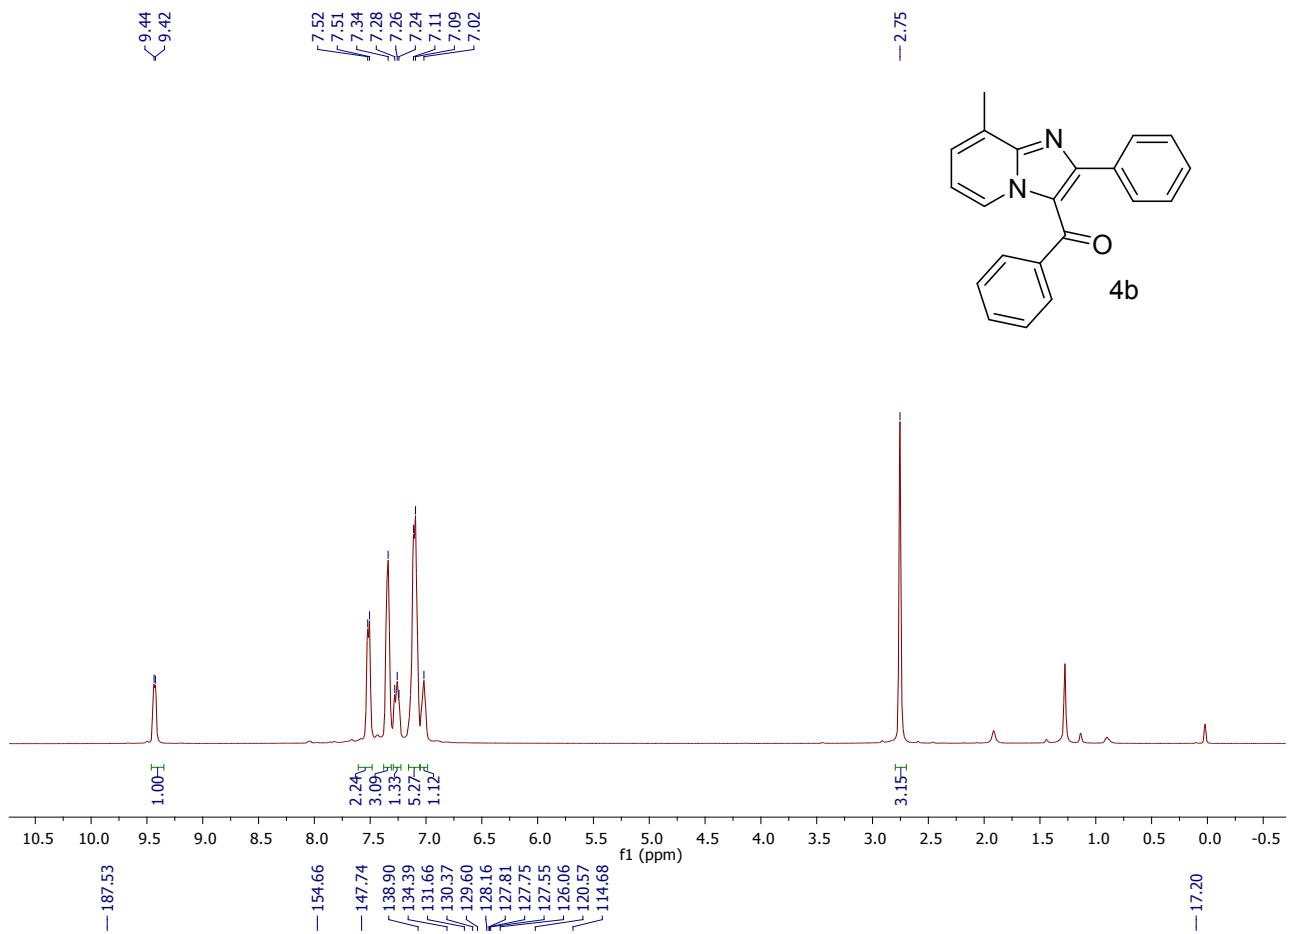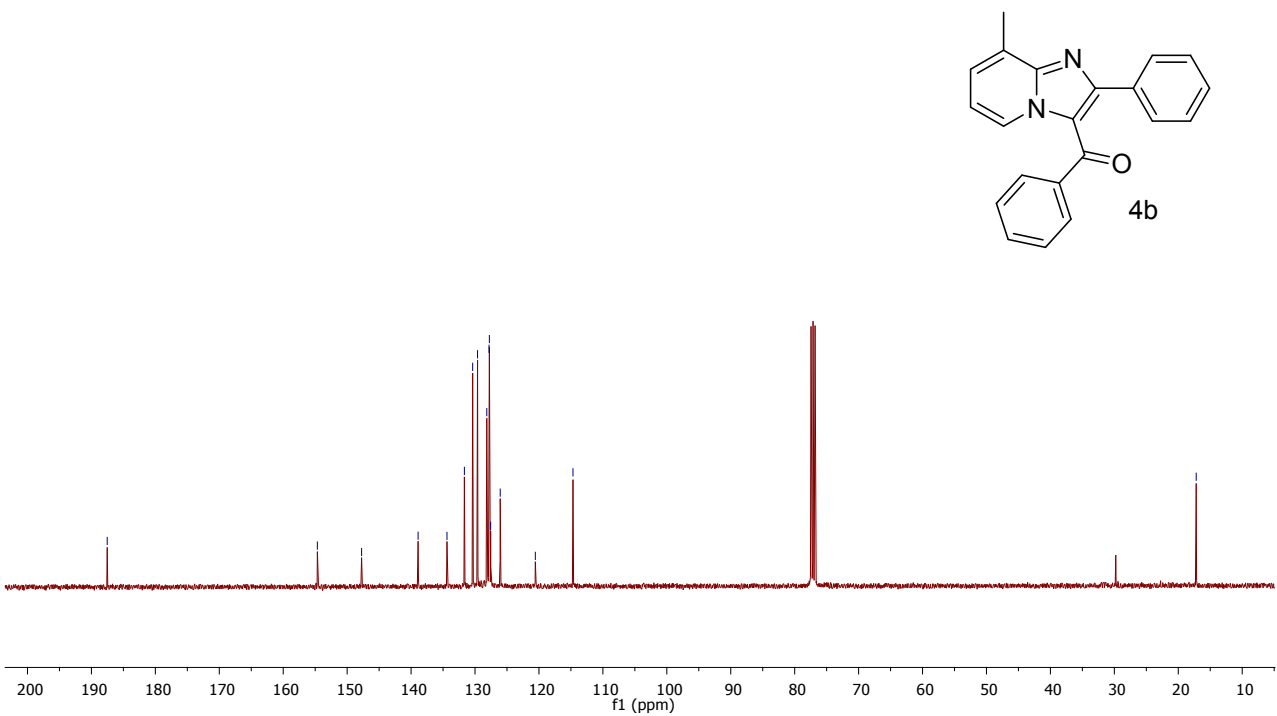

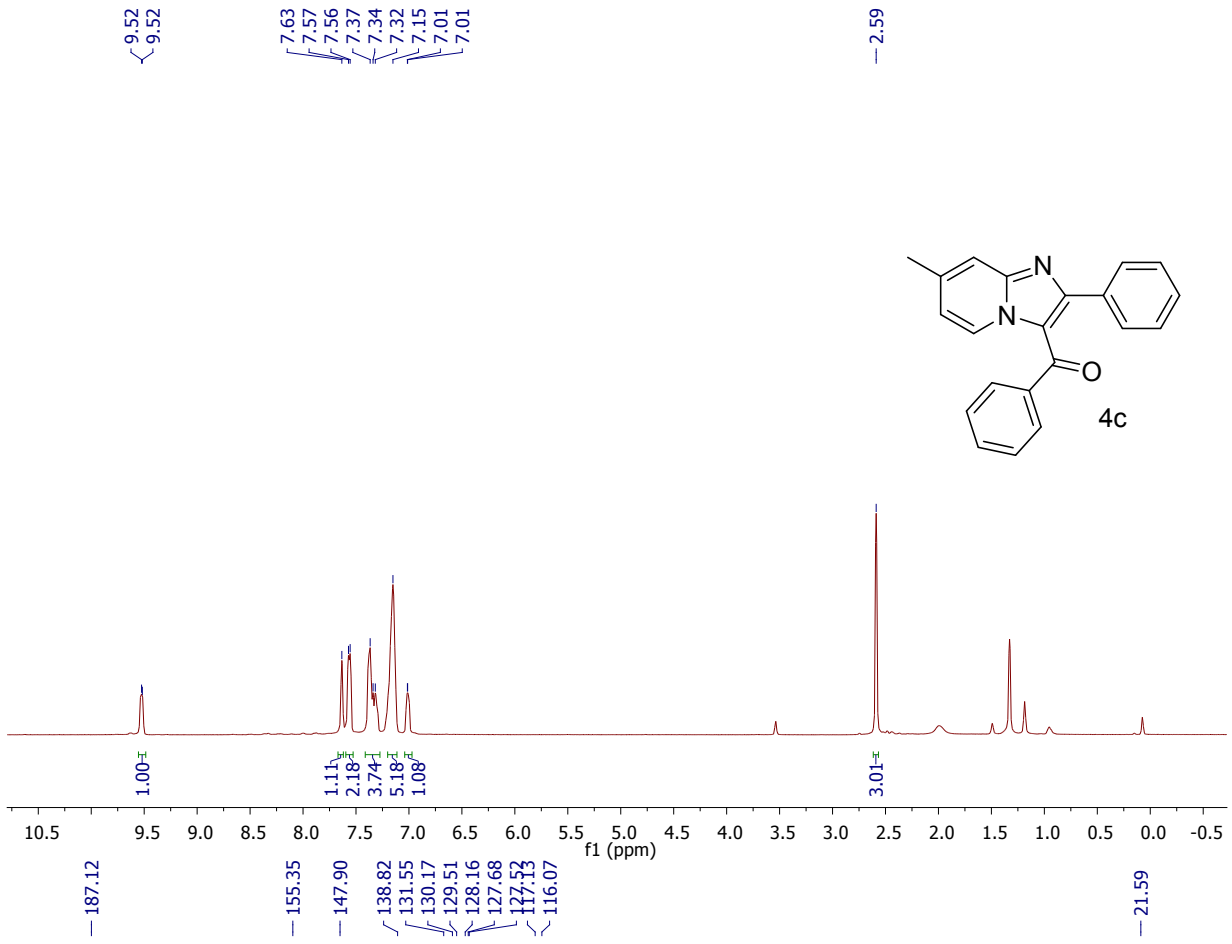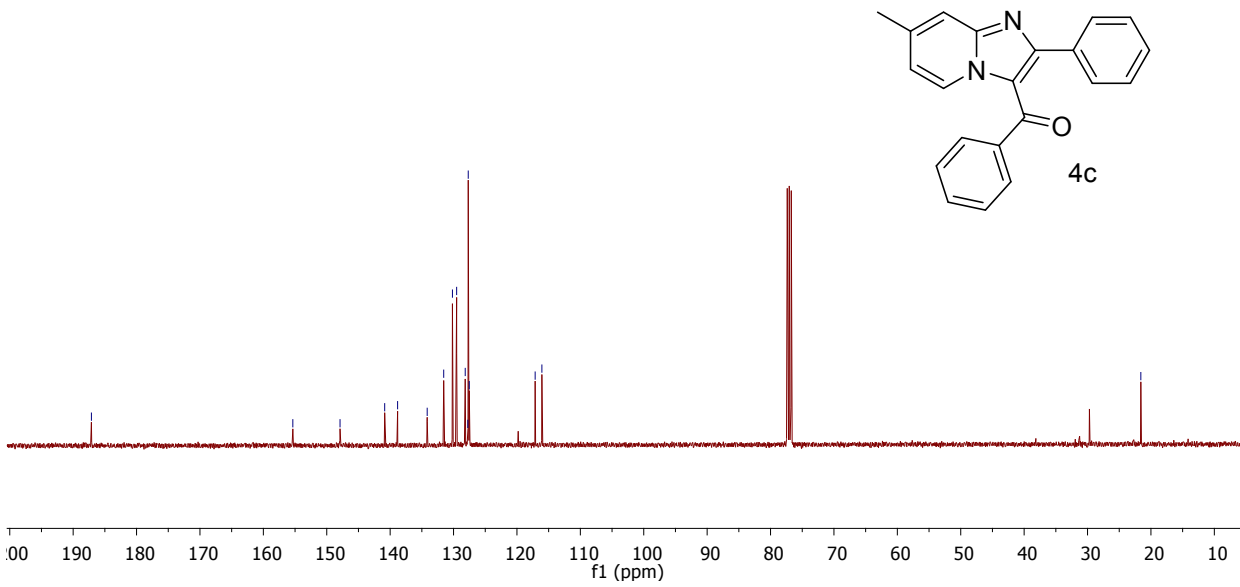

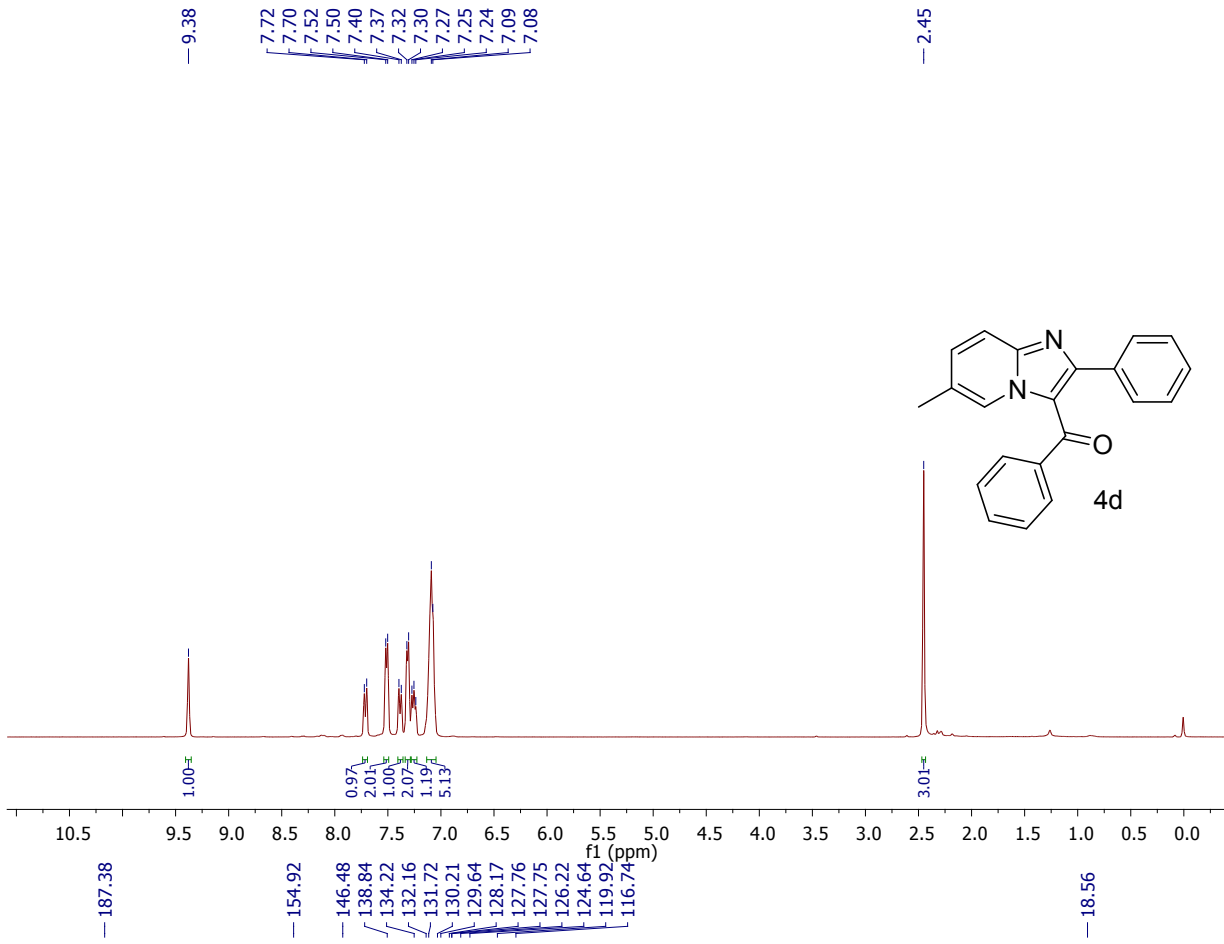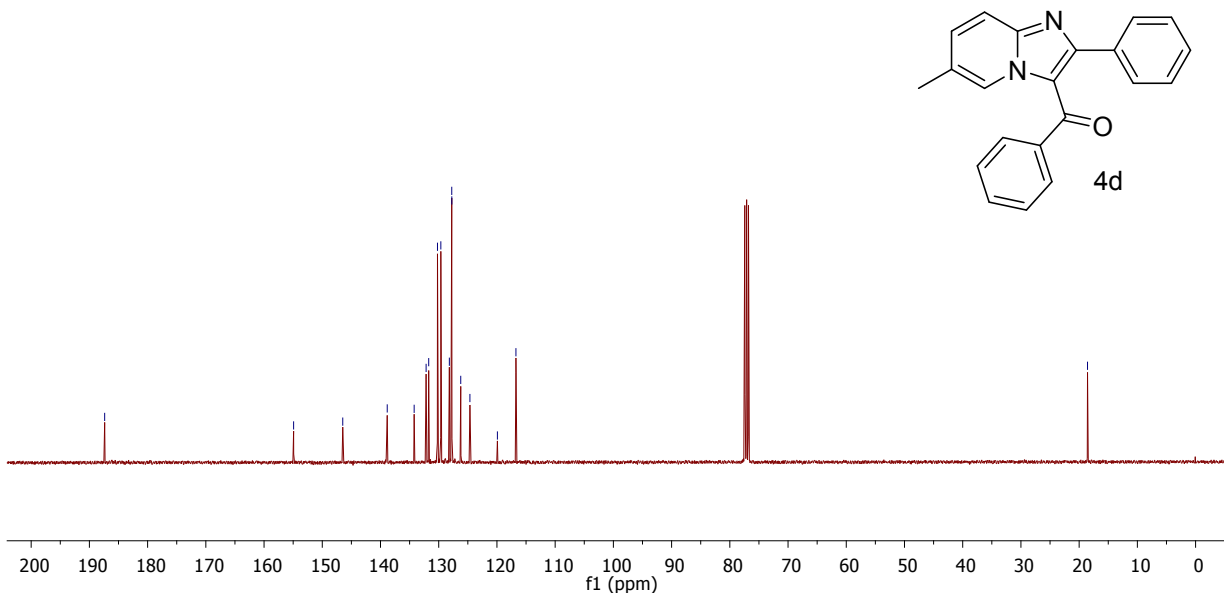

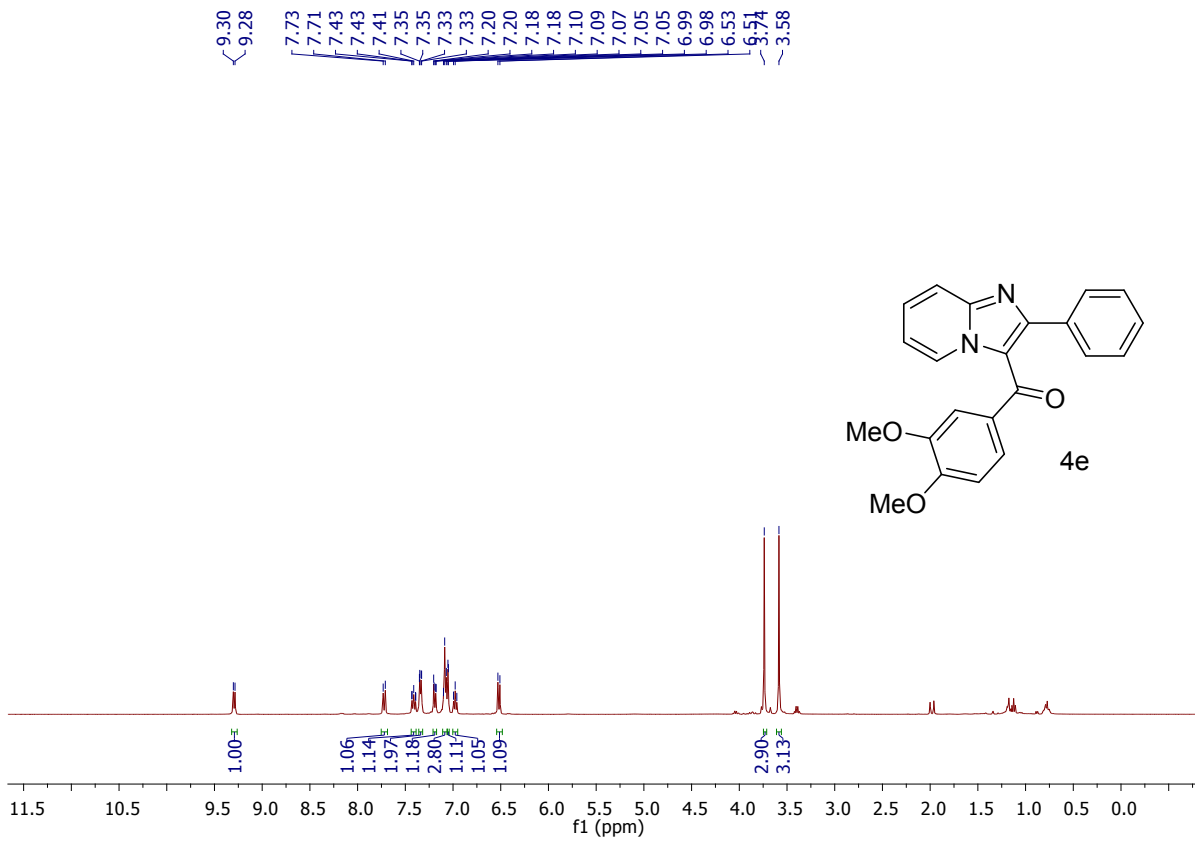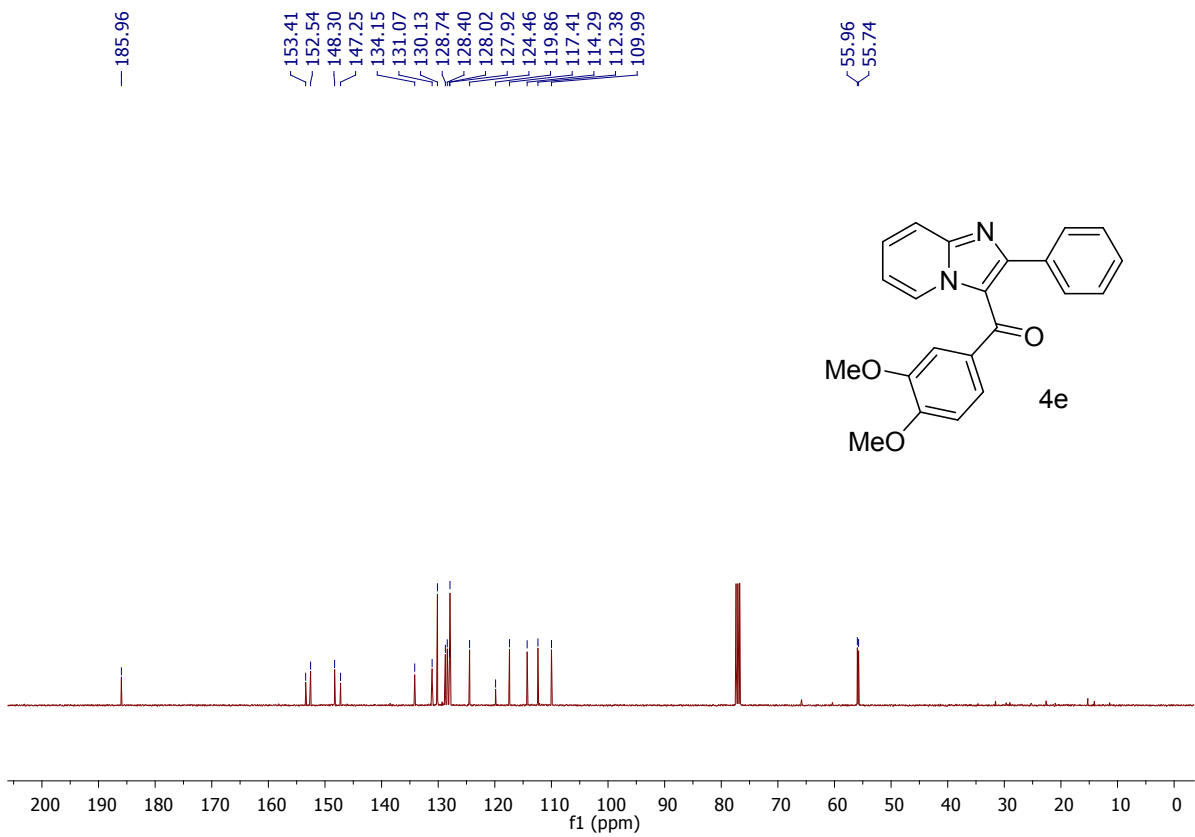

9.17  
9.16  
7.72  
7.69  
7.47  
7.46  
7.45  
7.44  
7.42  
7.42  
7.40  
7.40  
7.38  
7.37  
7.02  
7.02  
7.01  
7.01  
6.98  
6.97  
6.96  
6.96  
6.94  
6.61  
6.60  
6.59

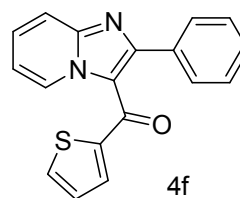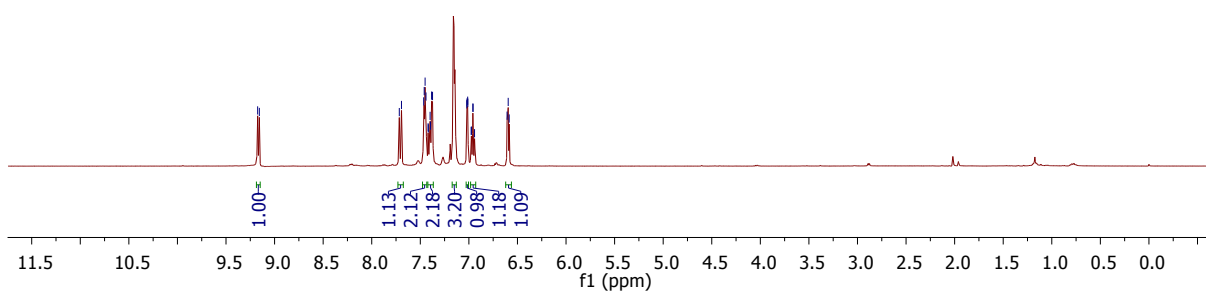

178.77  
153.19  
147.17  
143.59  
134.46  
134.20  
133.10  
130.04  
128.82  
128.51  
128.13  
127.76  
127.35  
119.83  
117.51  
114.33

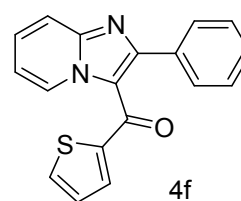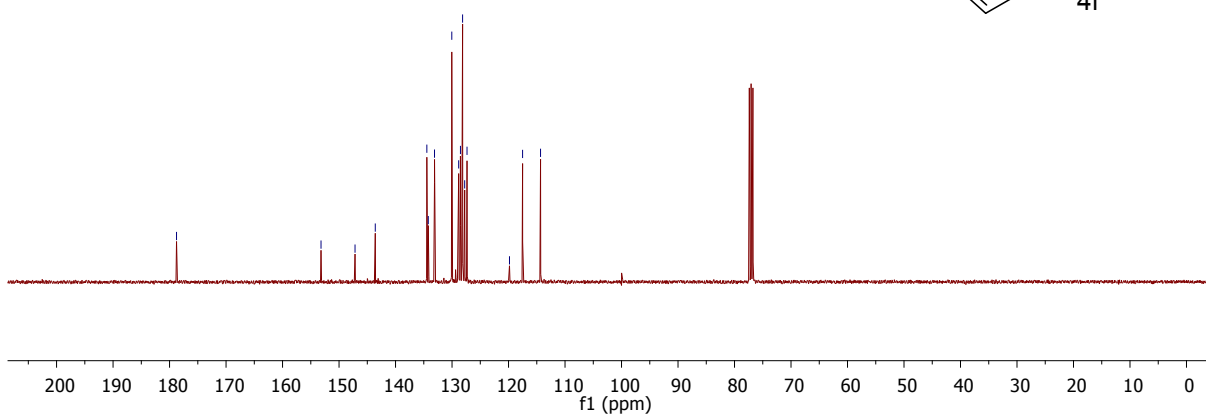

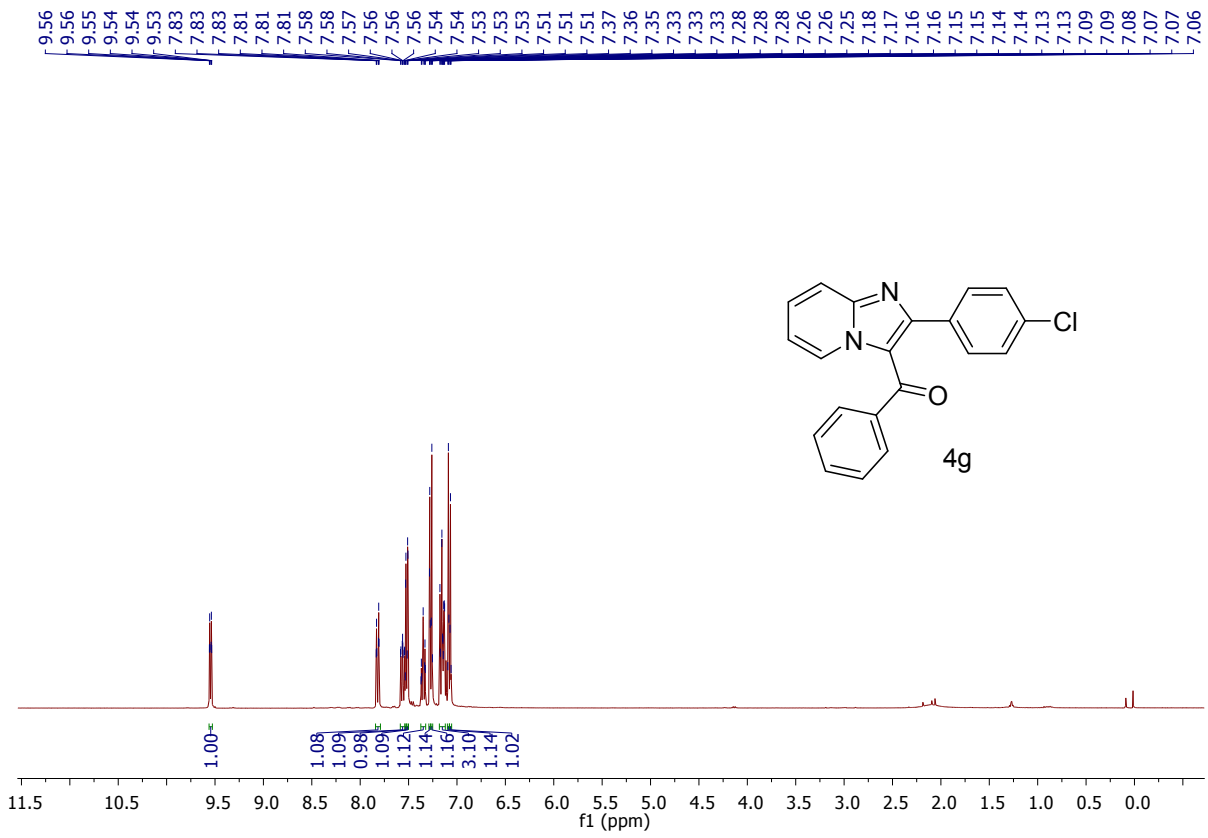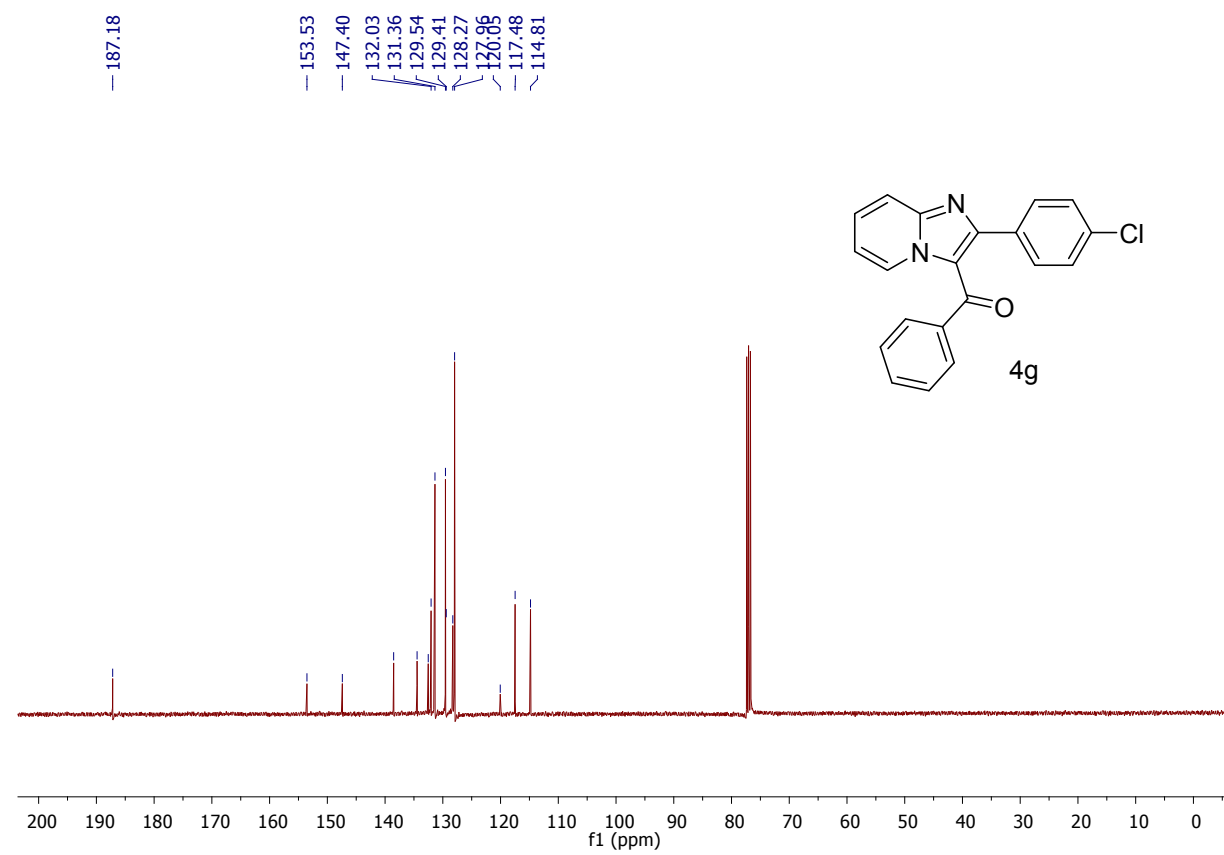



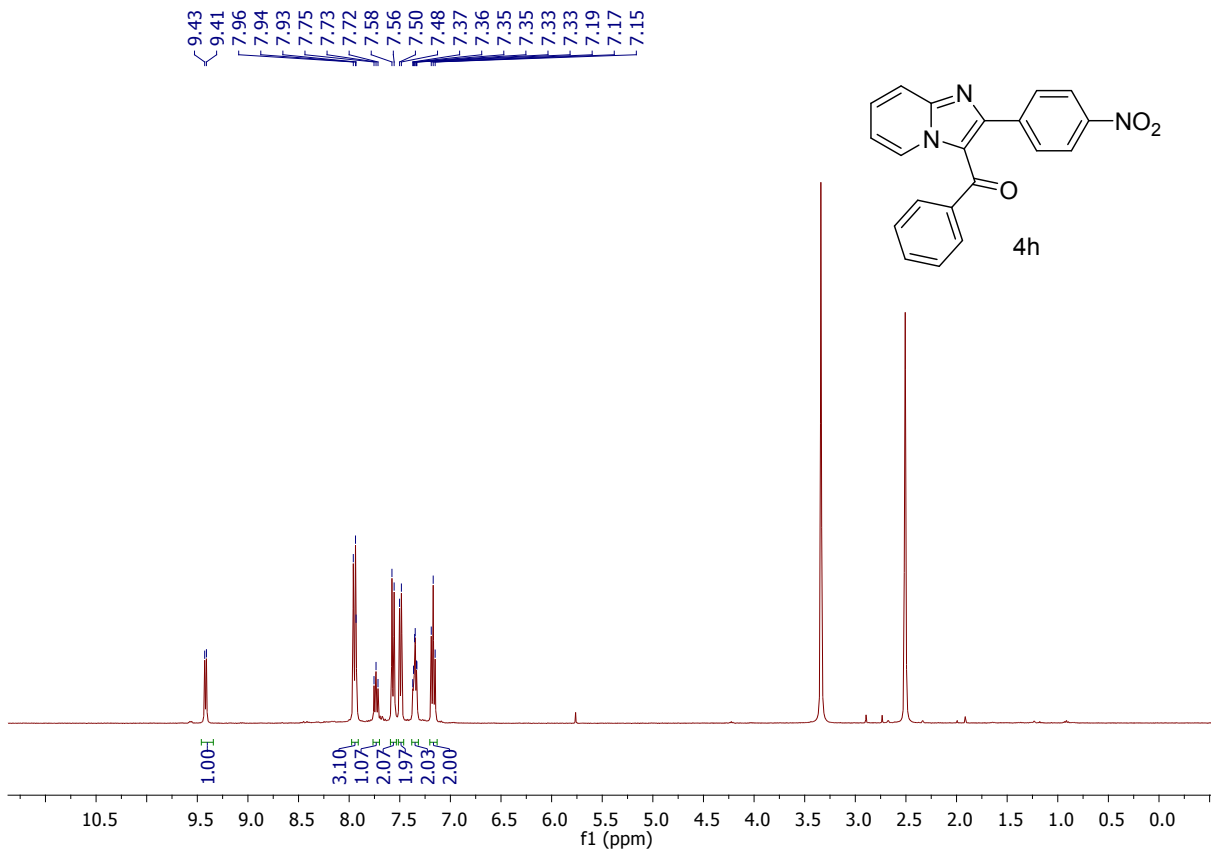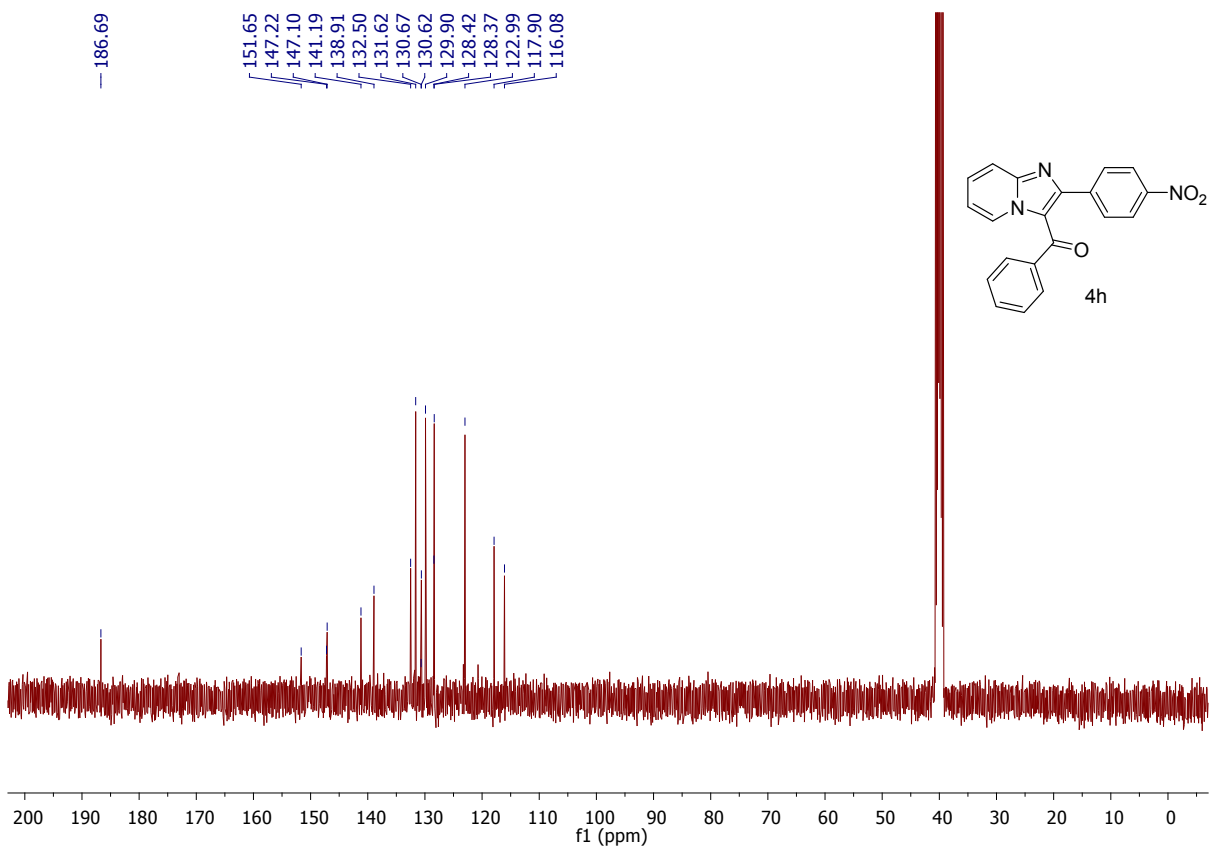

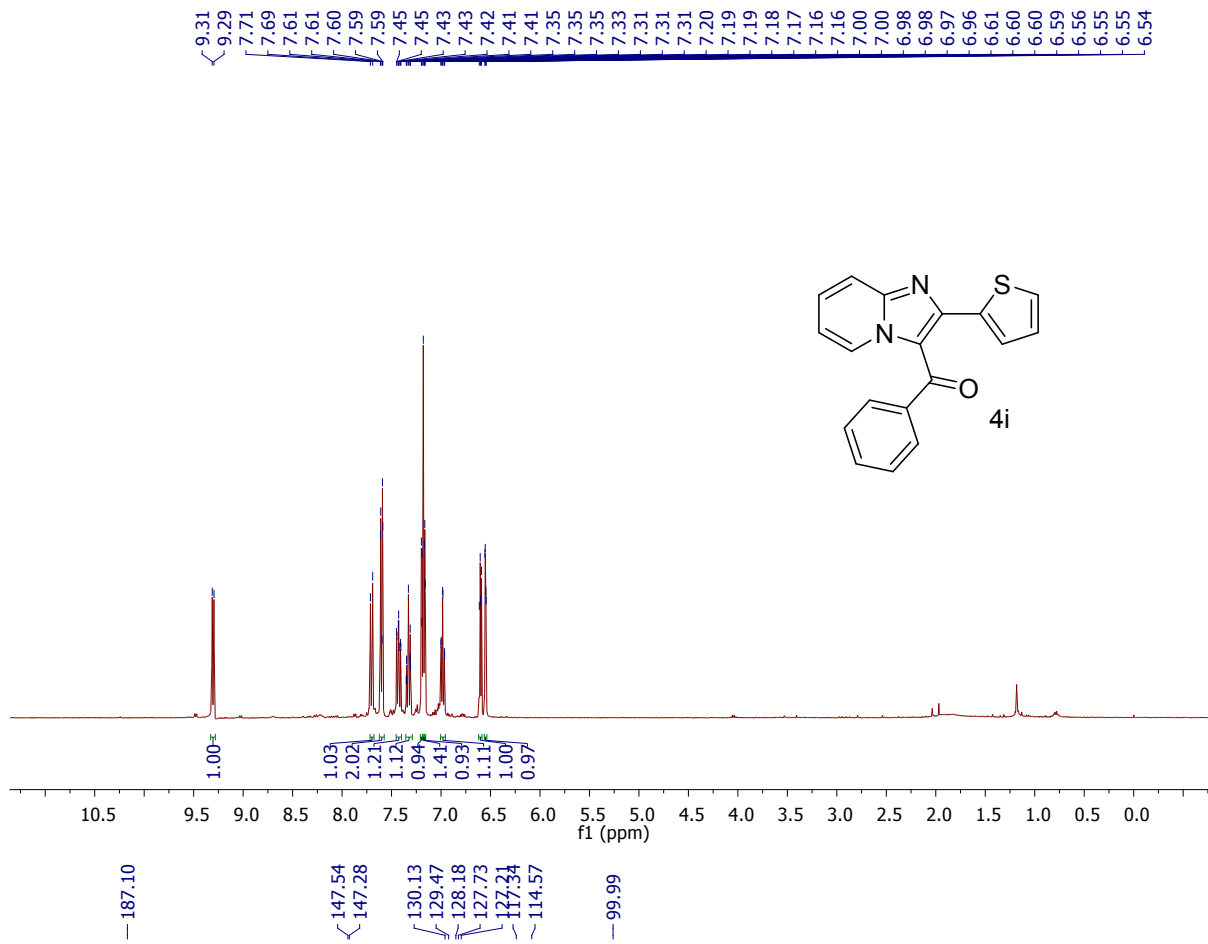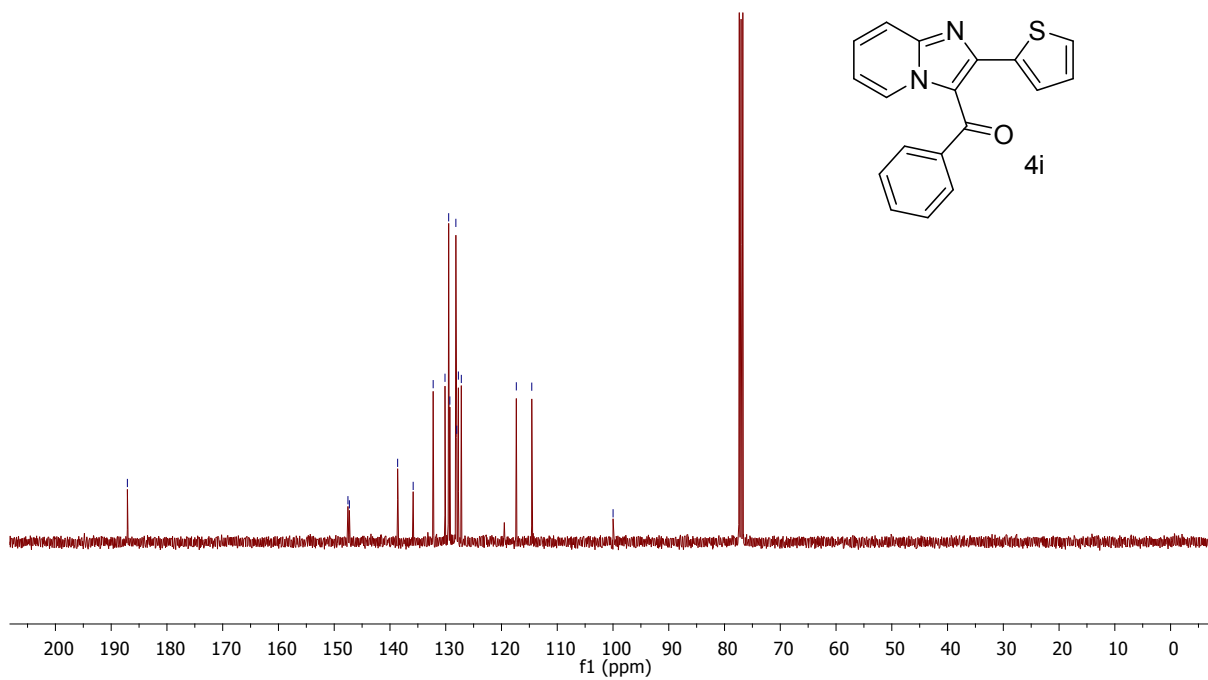

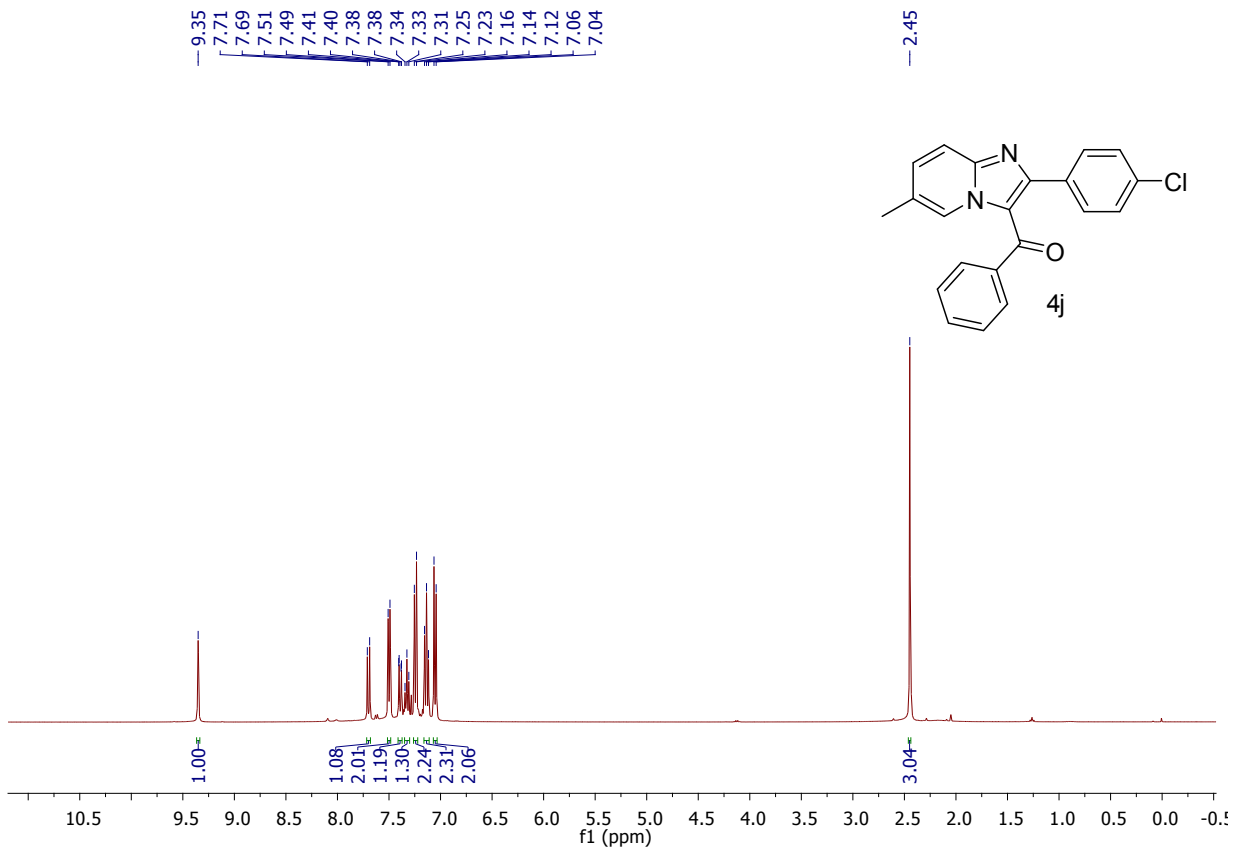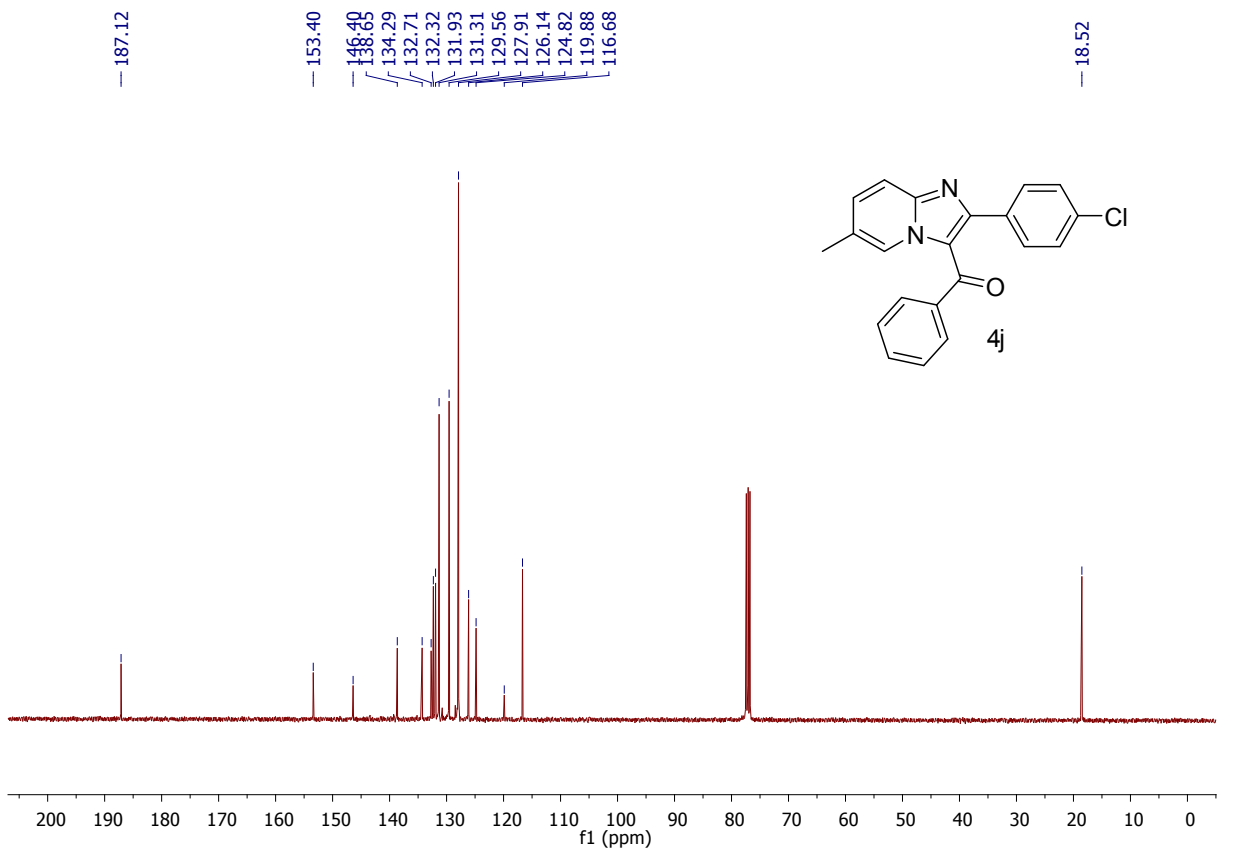

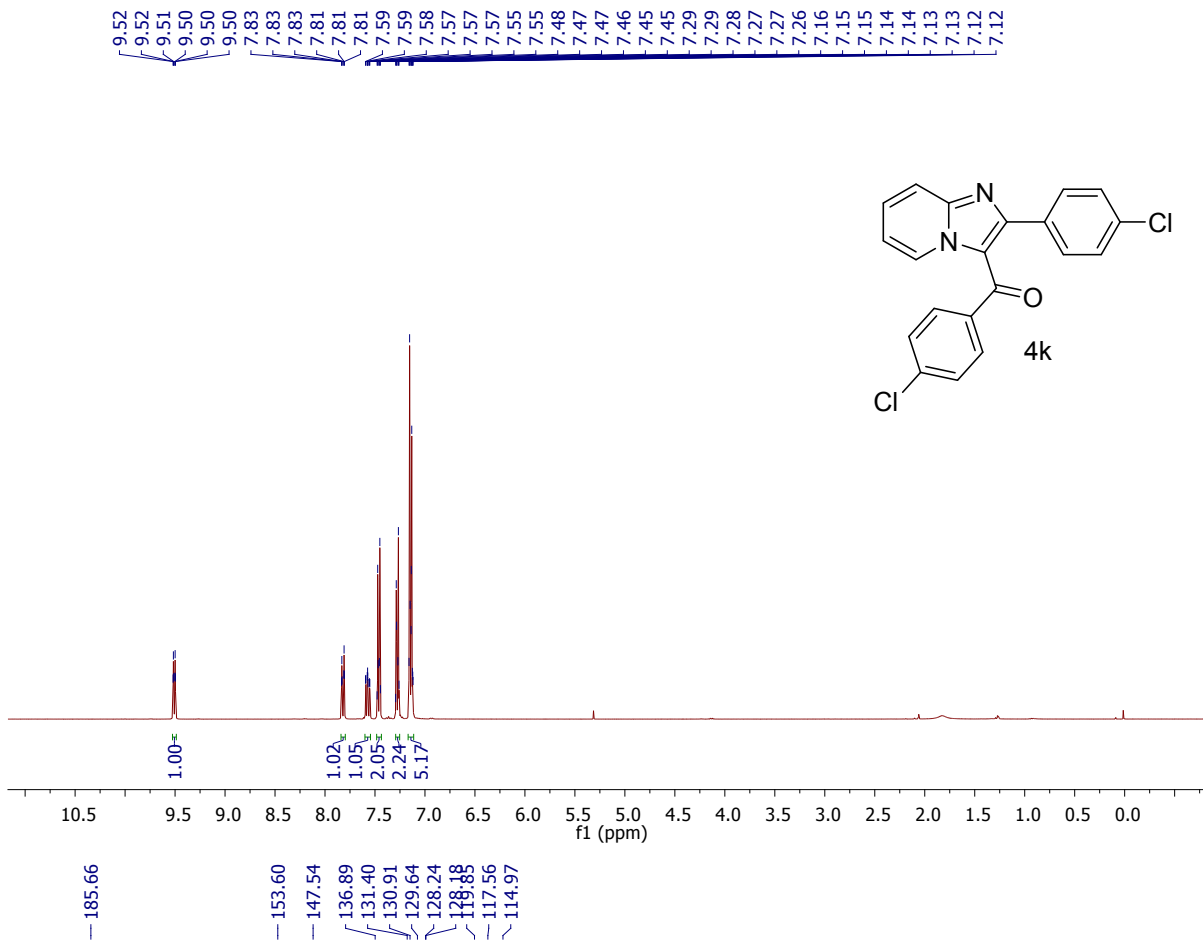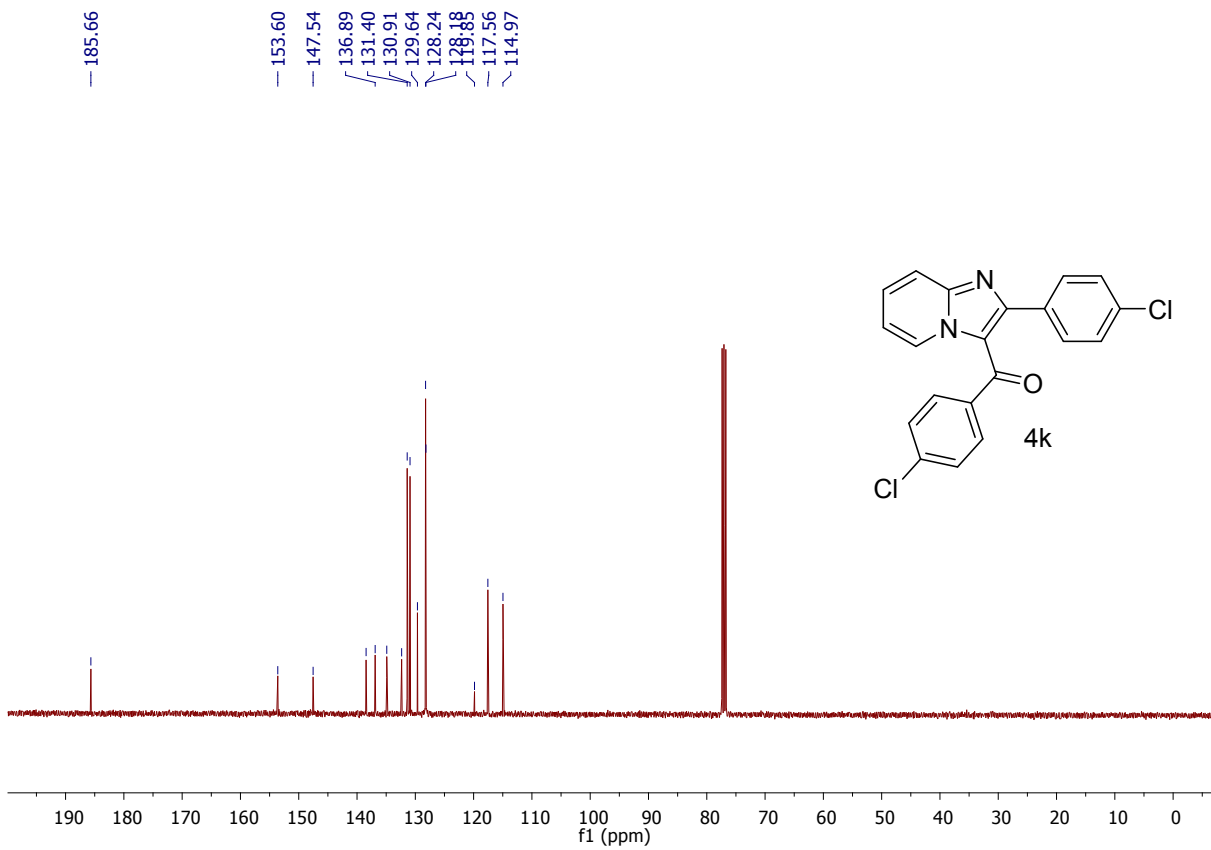

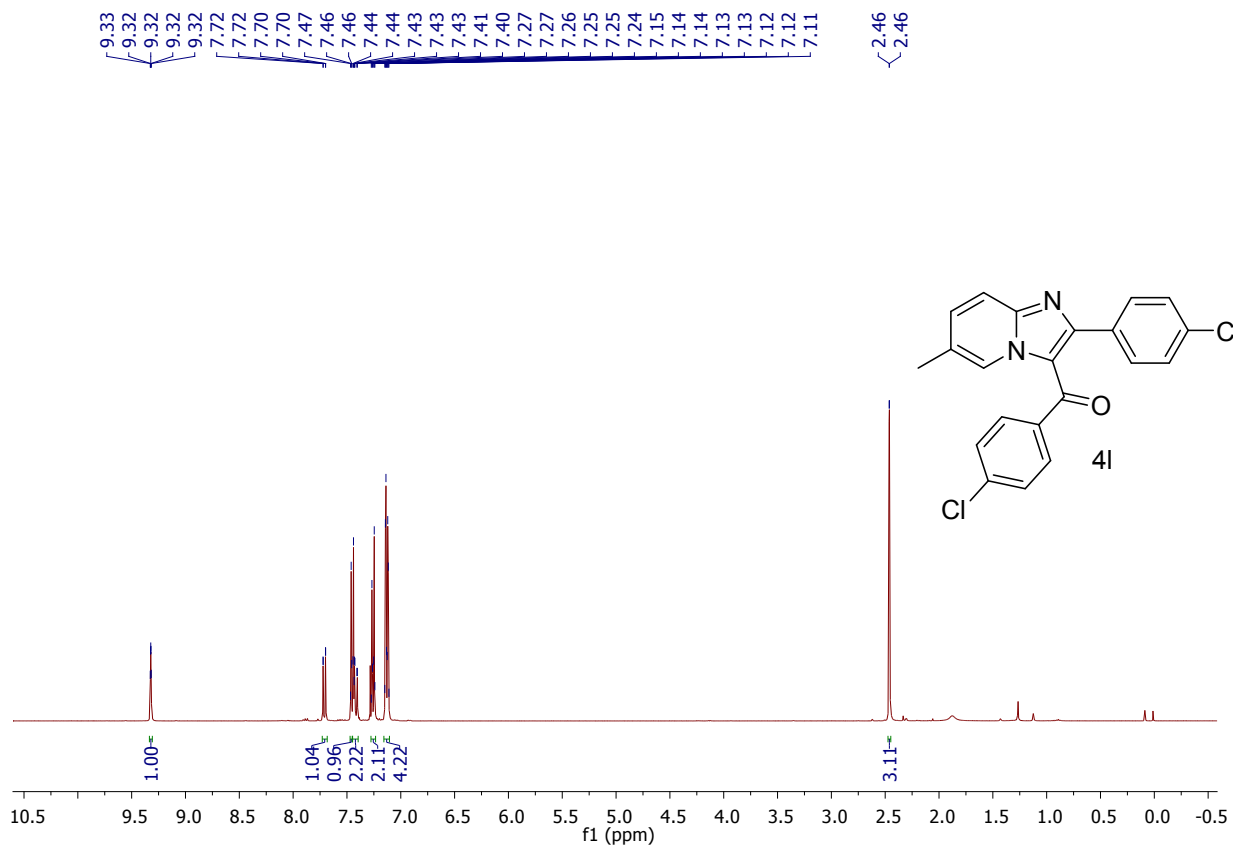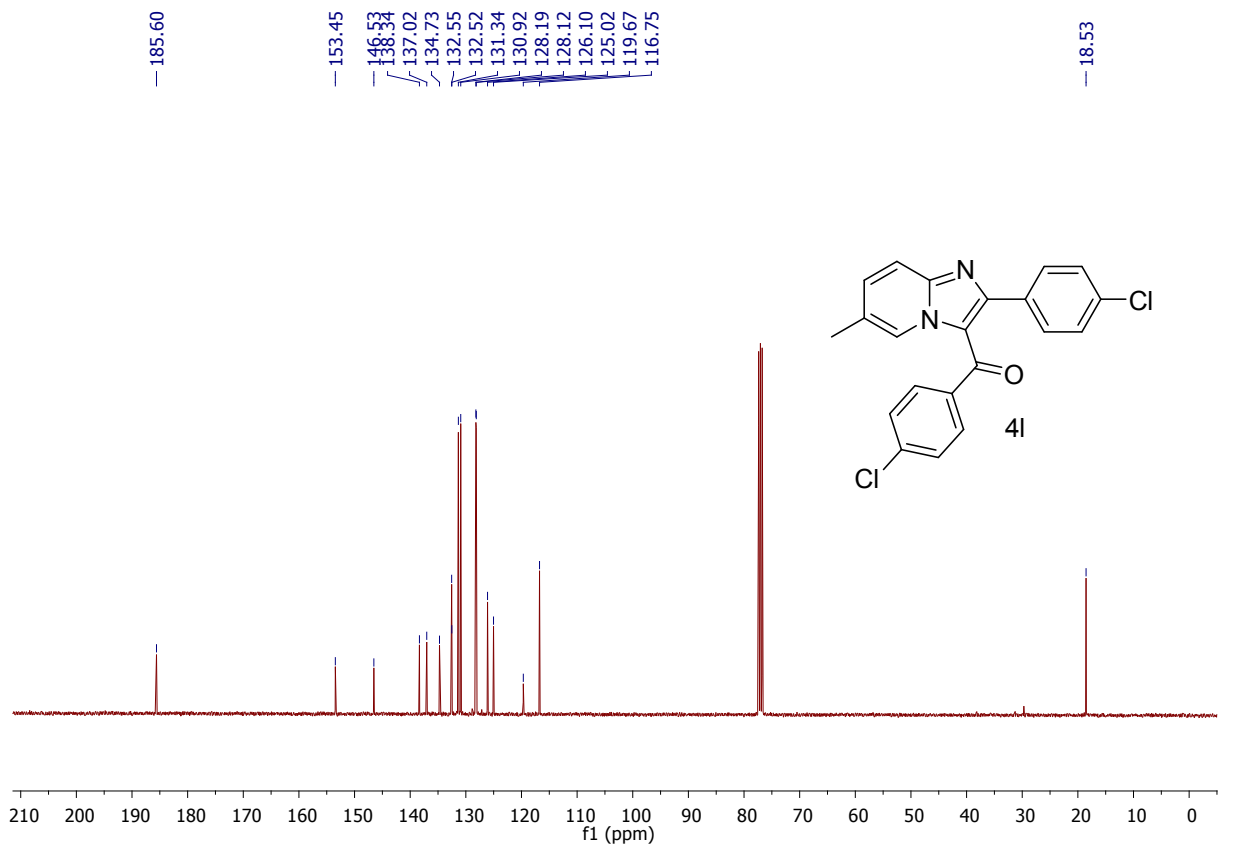

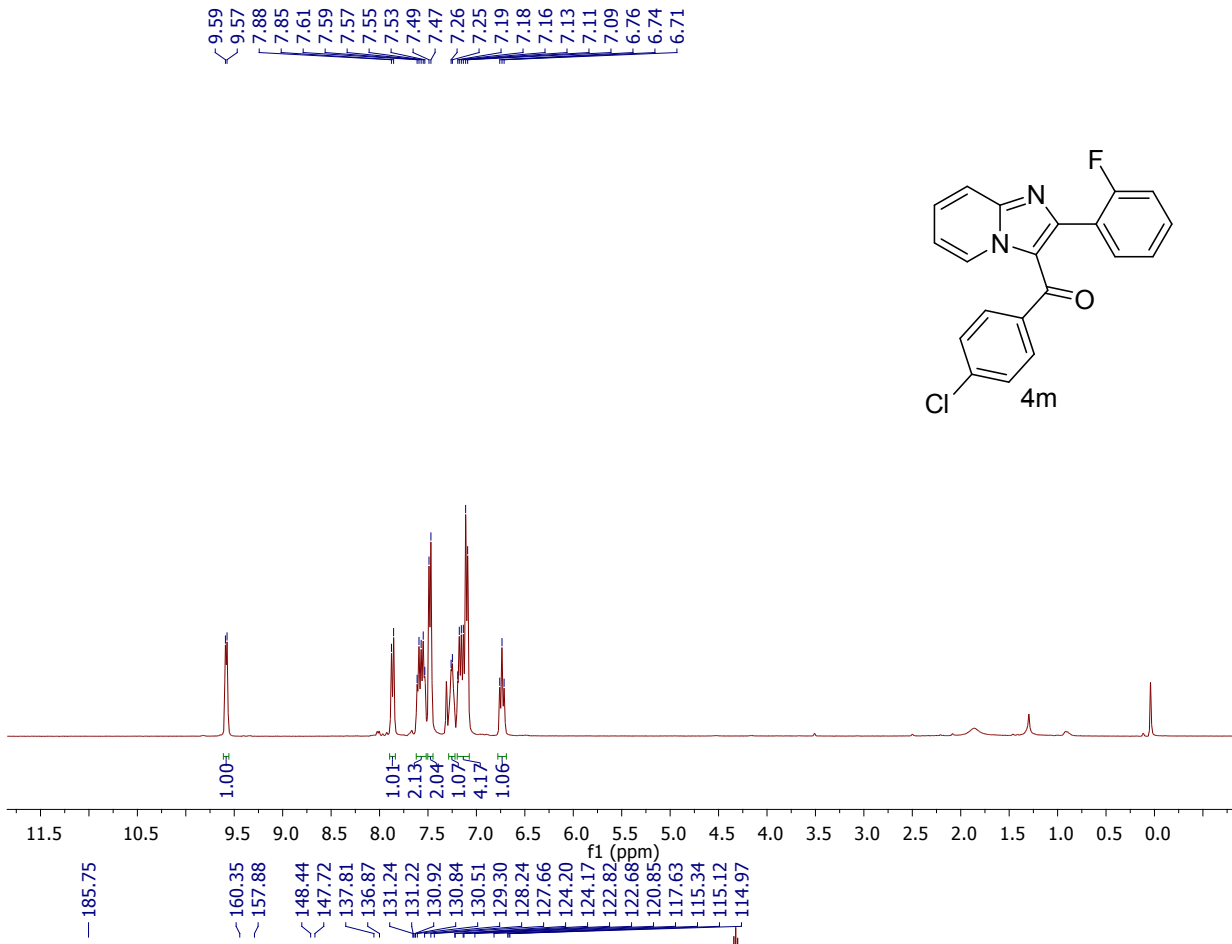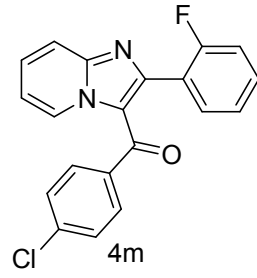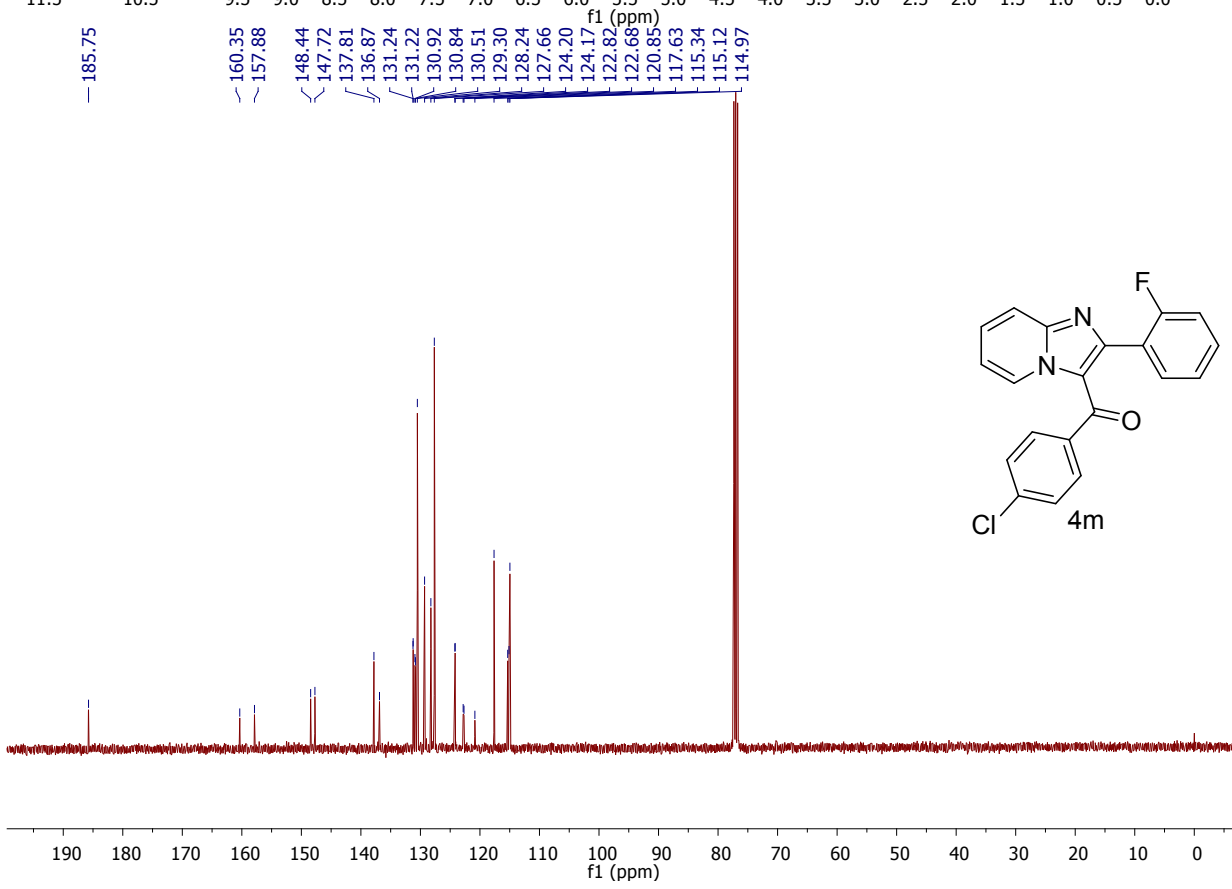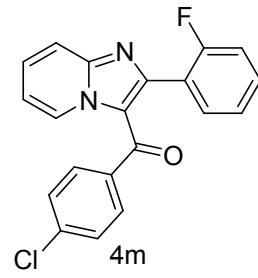

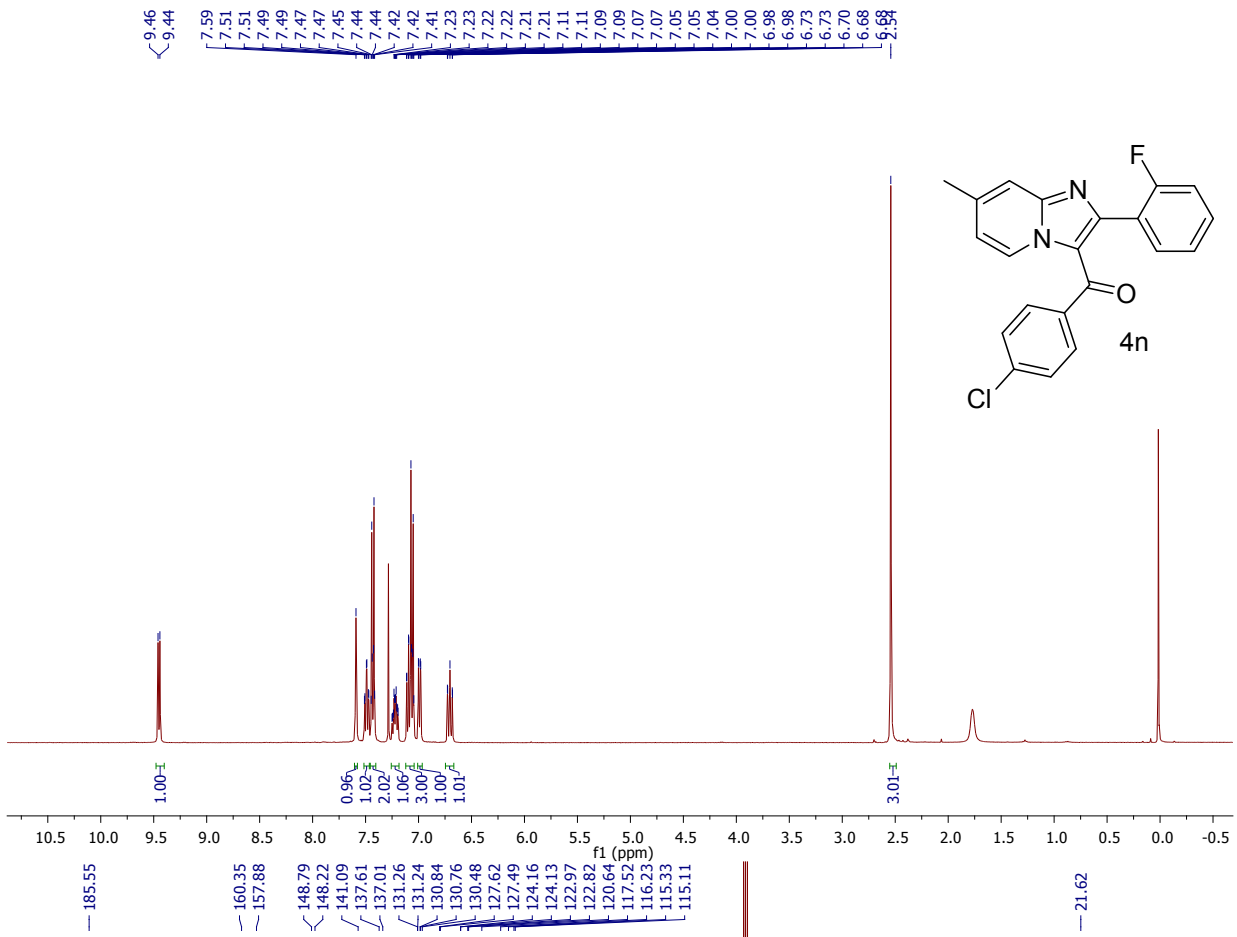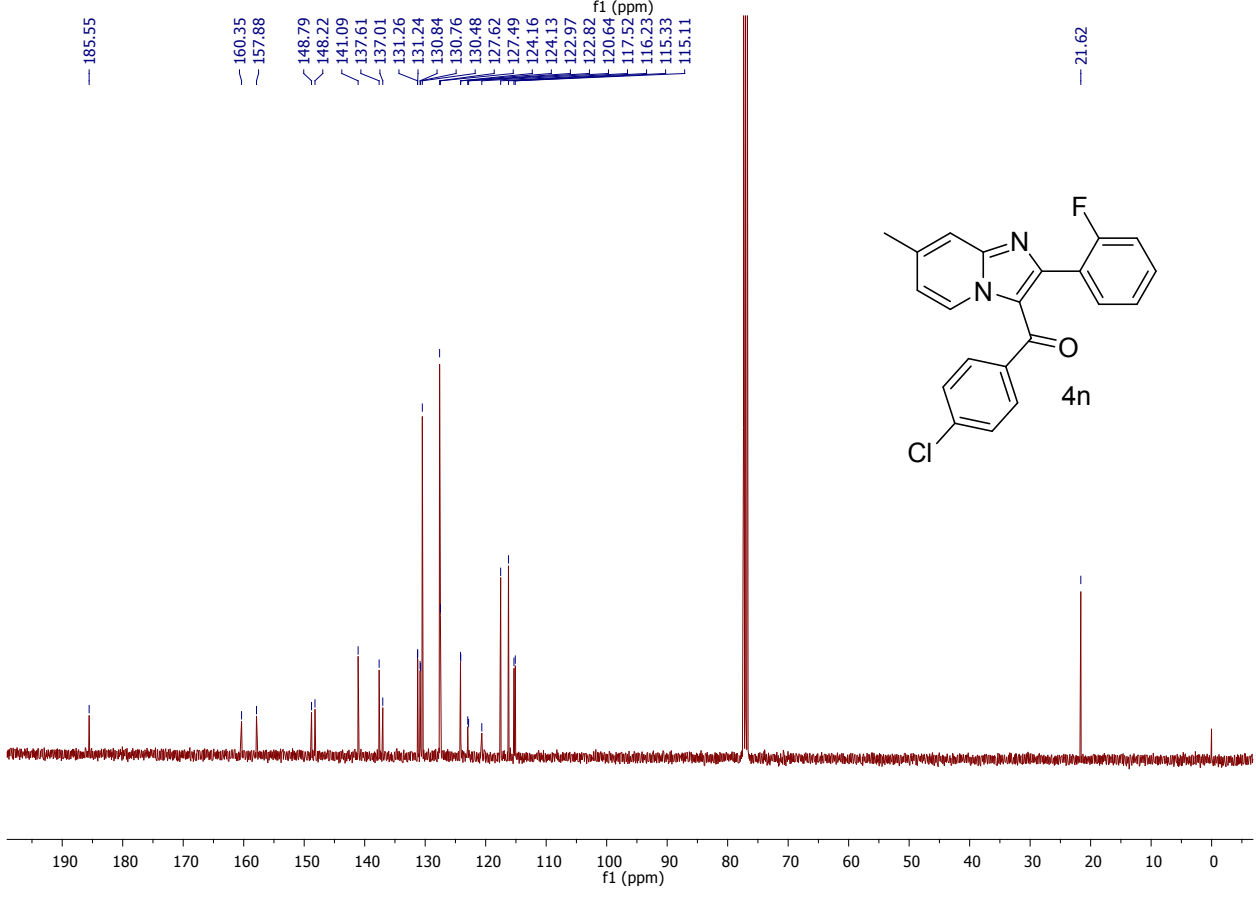

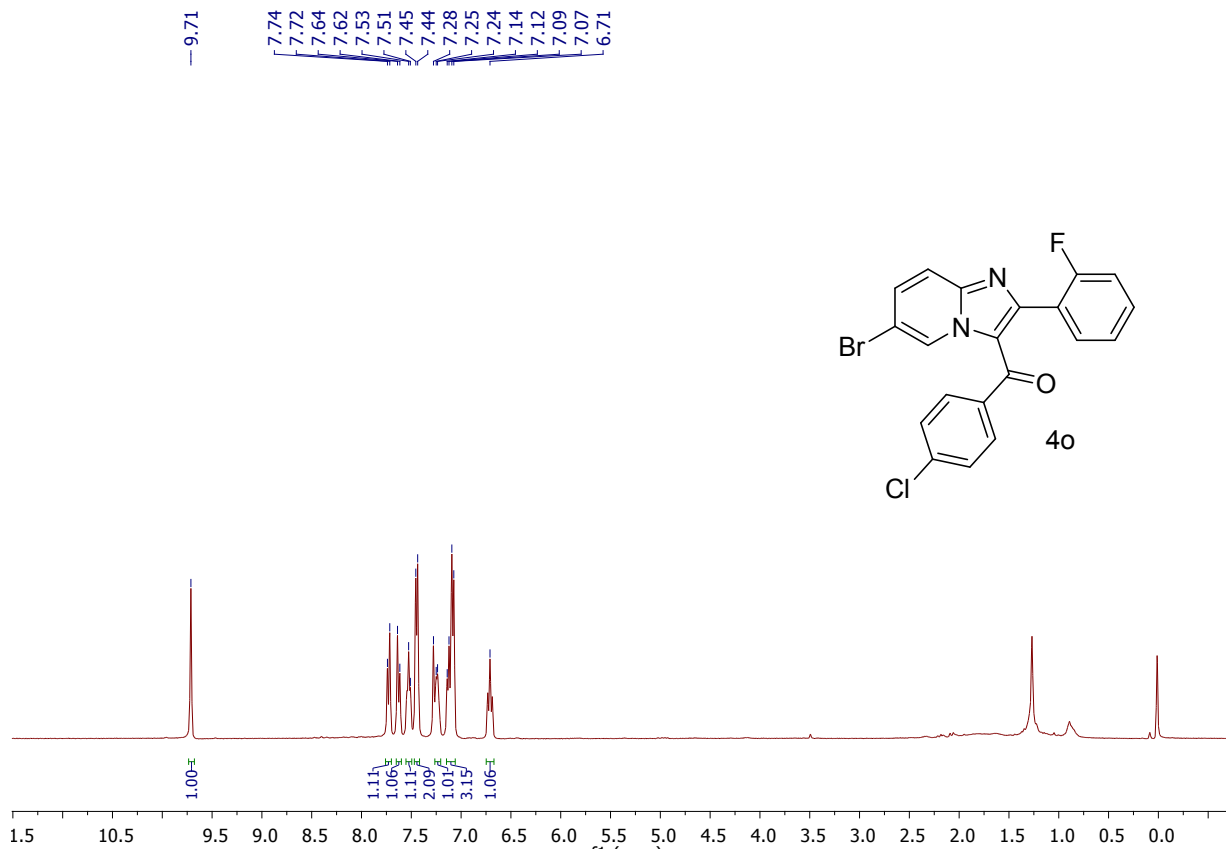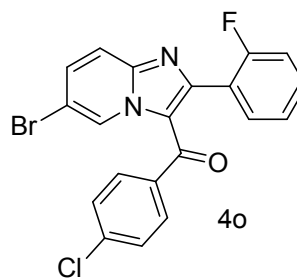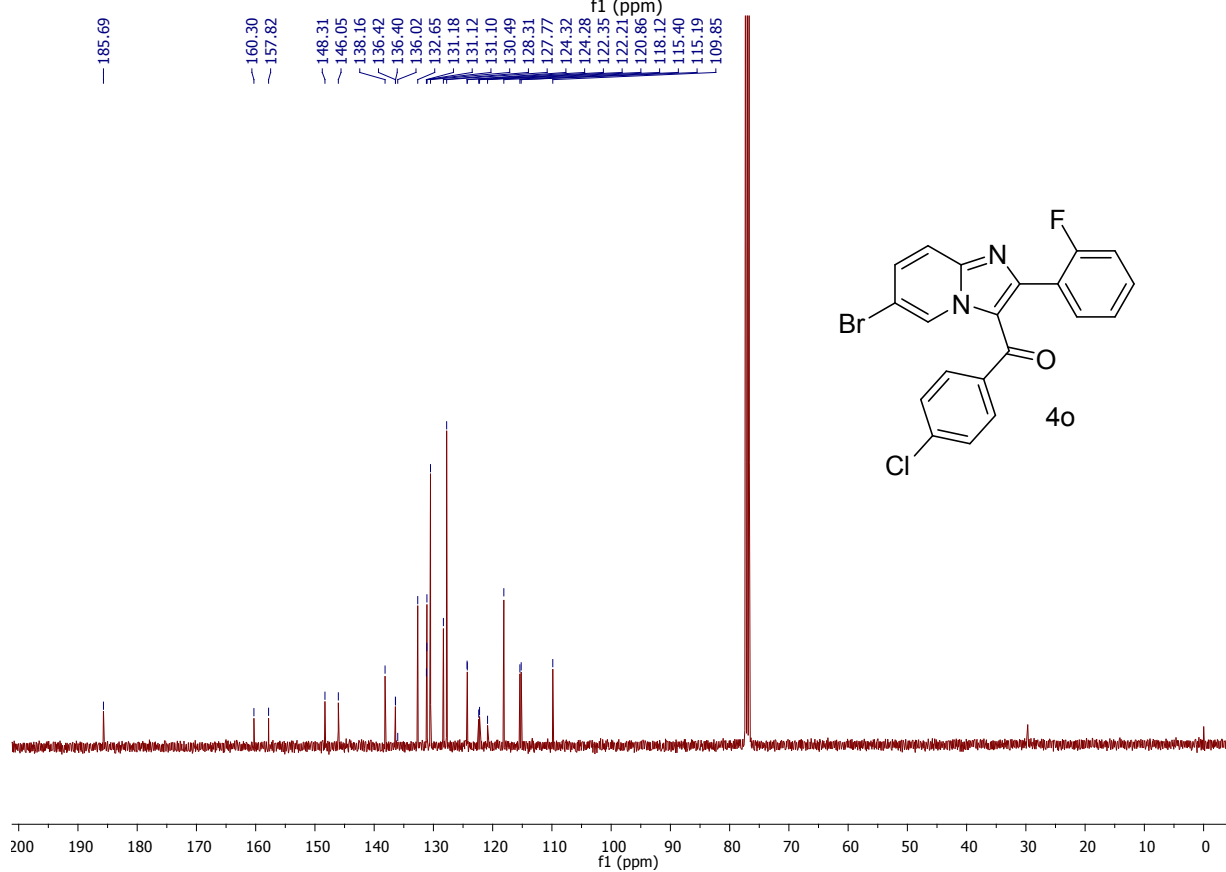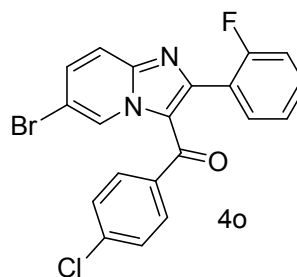



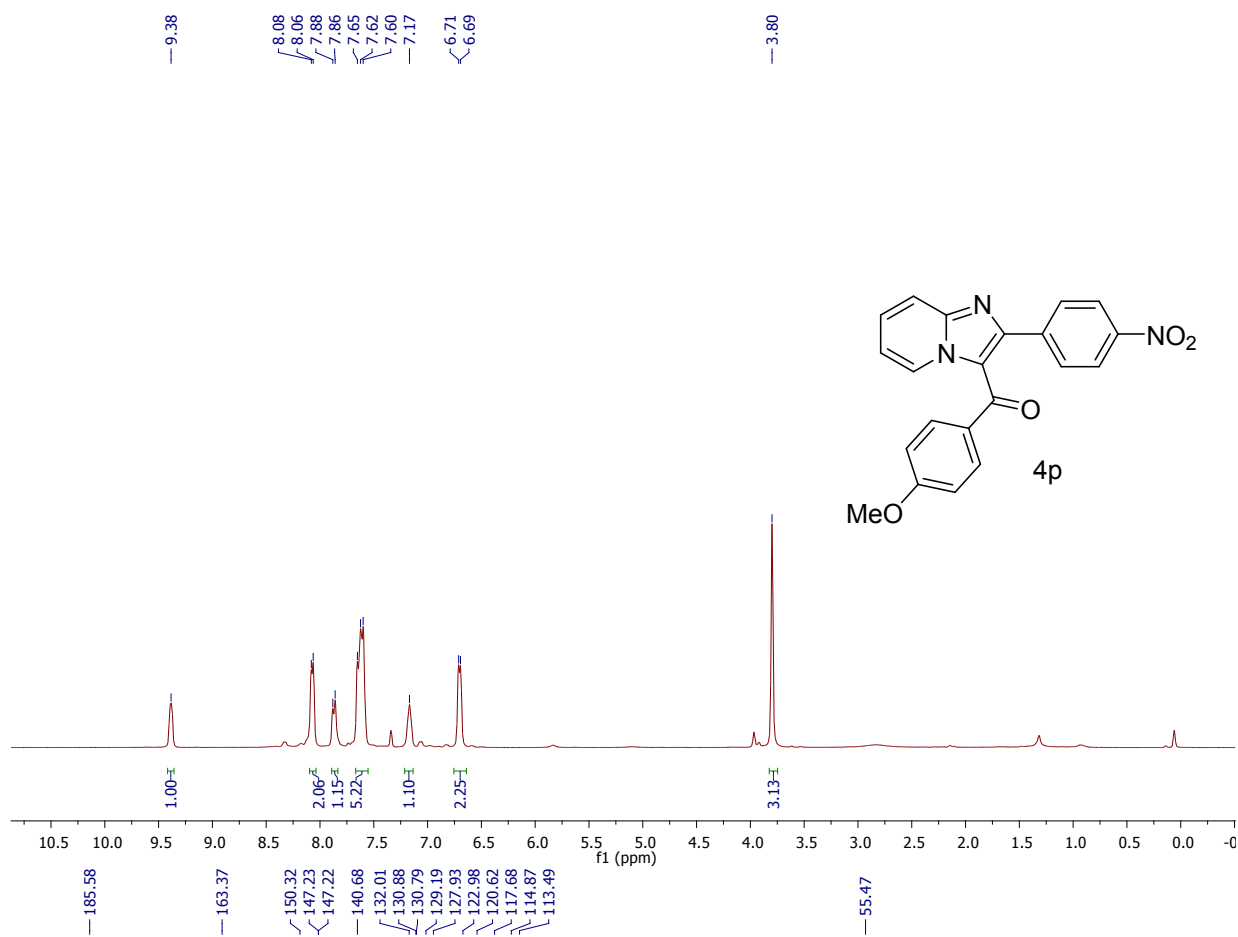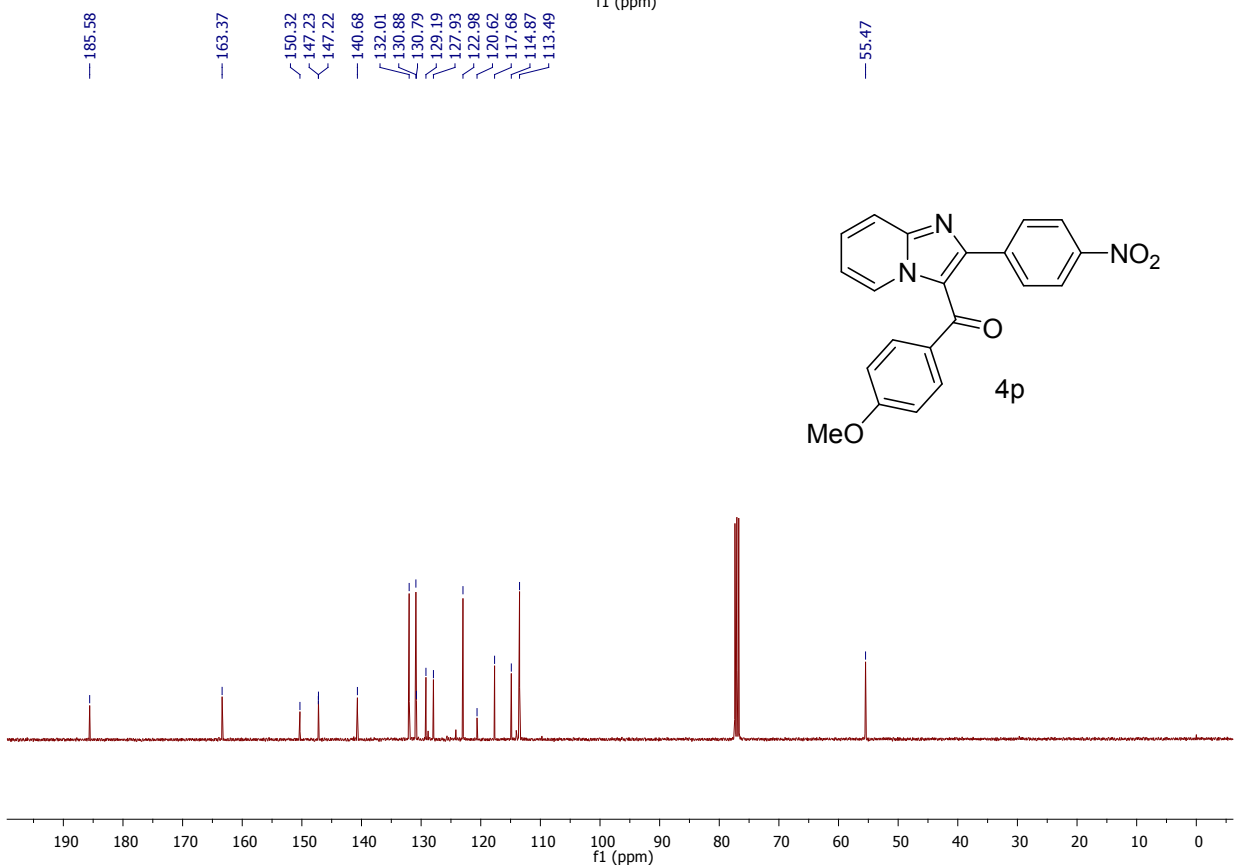

8.12  
8.10  
7.97  
7.95  
7.85  
7.67  
7.64  
7.46  
7.44  
7.41  
7.35  
7.33  
7.30  
7.26  
7.20  
7.17  
7.15  
6.80  
6.78  
6.75

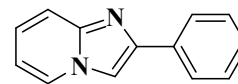

6a

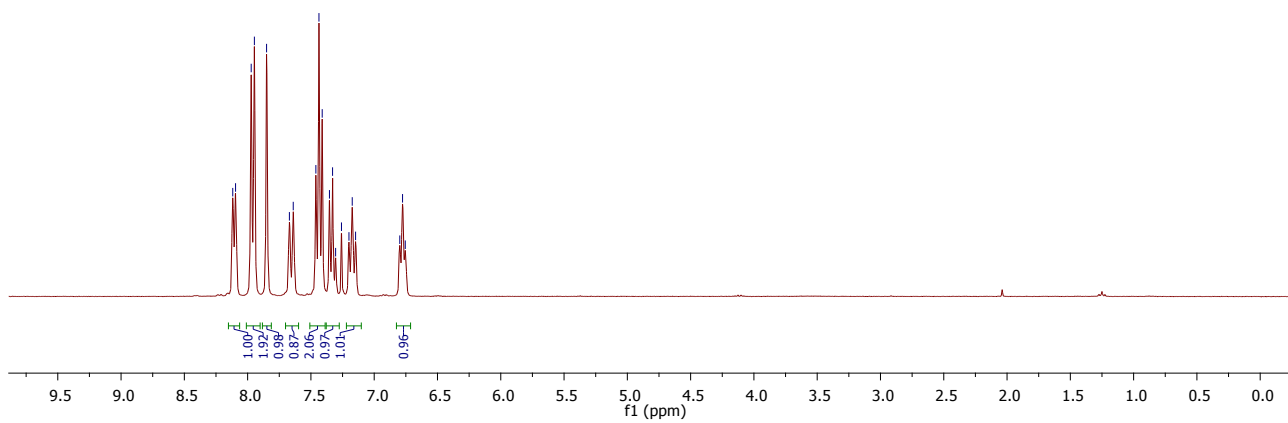

145.74  
137.95  
133.65  
128.69  
127.99  
126.11  
125.59  
124.76  
117.55  
112.51  
108.19

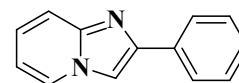

6a

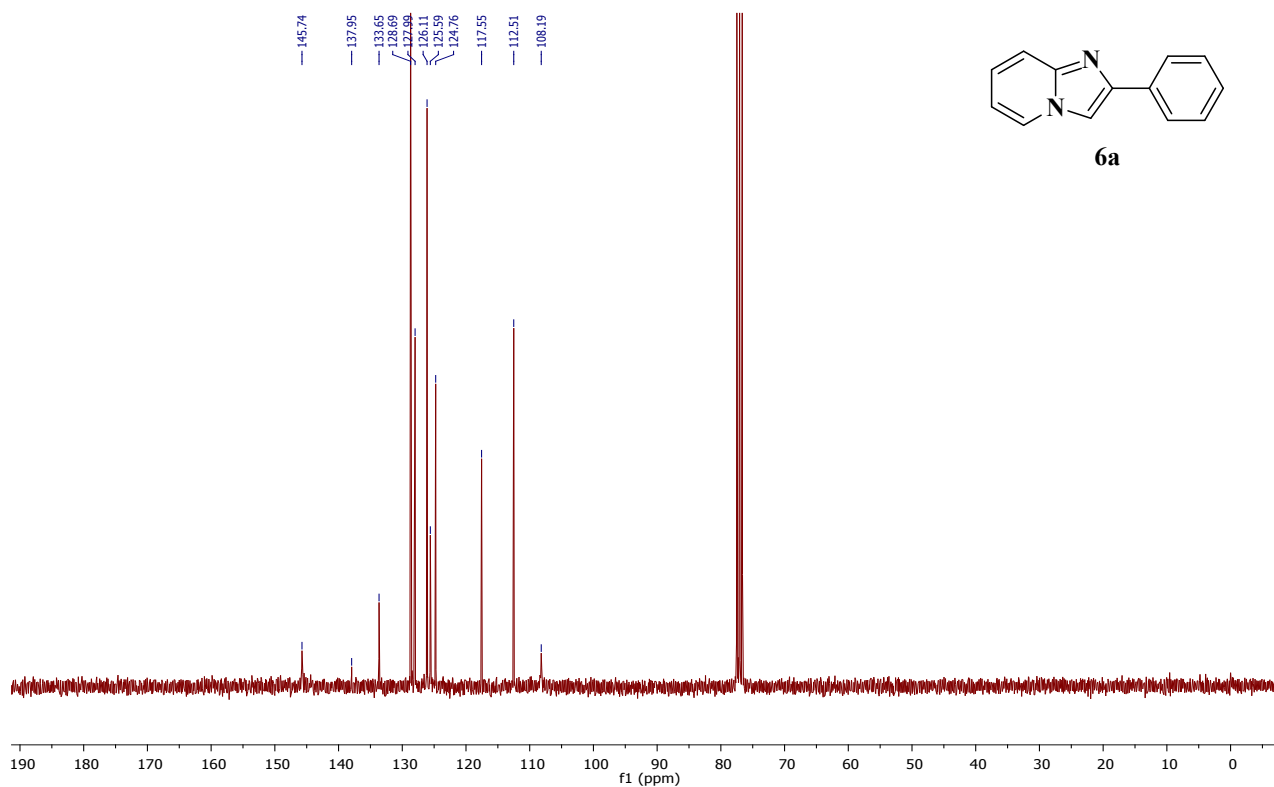

Supplement: c4ra13056a1.pdf [file c4ra13056a1.pdf]
